# Supplementary material for: RETRACTED: A Novel Herbal Hydrogel Formulation of Moringa oleifera for Wound Healing
Source: PubMed Central journal article supplement (PMC7824484; doi:10.3390/plants10010025), 2020-12-24
Supplement: plants-10-00025-s001.pdf [file plants-10-00025-s001.pdf]

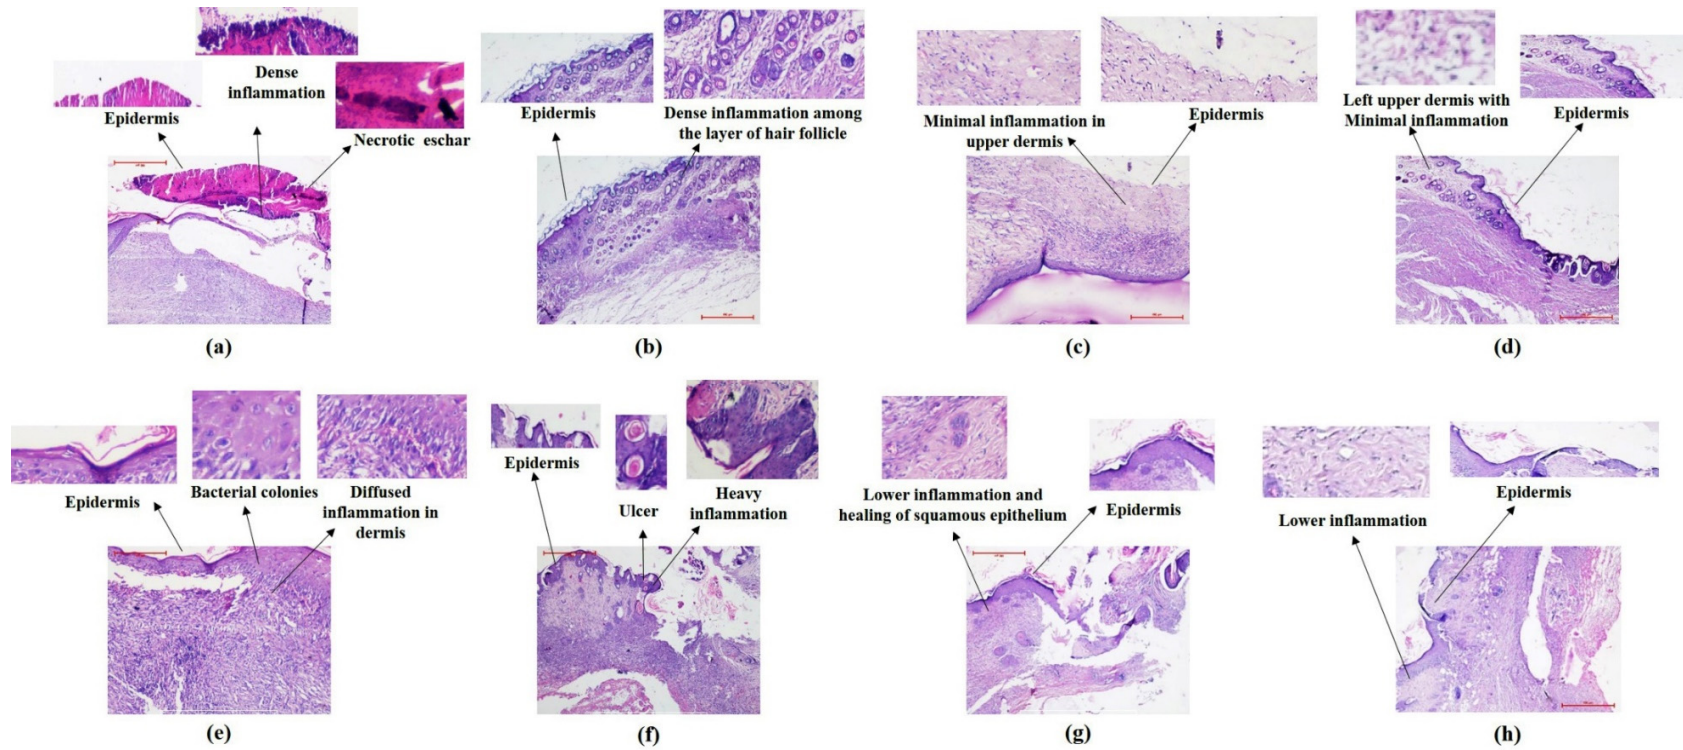

**Figure S1.** Histopathological study. **(a)** Control group for excision model **(b)** povidone 5% group for excision model **(c)** n-Hexane hydrogel 5% group for excision model **(d)** n-Hexane hydrogel 10% group for excision model **(e)** Control group incision model **(f)** povidone 5% incision model **(g)** n-Hexane hydrogel 5% group incision model **(h)** n-Hexane hydrogel 10% group incision model
